# Supplementary material
Source: Springer Nature journal article supplement (https://www.springermedizin.de/resource/supplementary/12889_2009_1717_MOESM2_ESM.pdf/9503810)

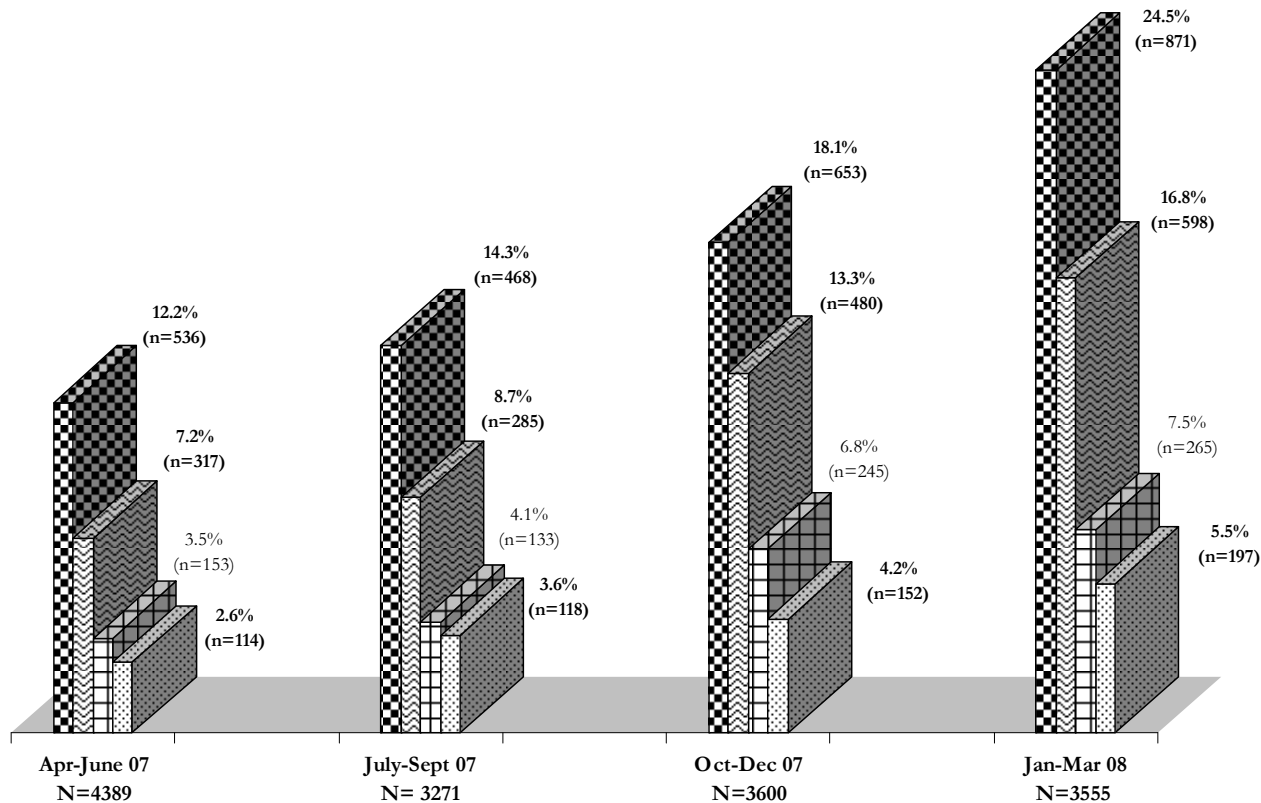

Checked for CD4
  Results available
  Eligible for cART
  Initiated on cART

Supplement: MOESM2 [file 9503810]
